# Supplementary material
Source: Springer Nature journal article supplement (https://www.springermedizin.de/resource/supplementary/12933_2011_336_MOESM1_ESM.pdf/9538188)

**p=0.008**

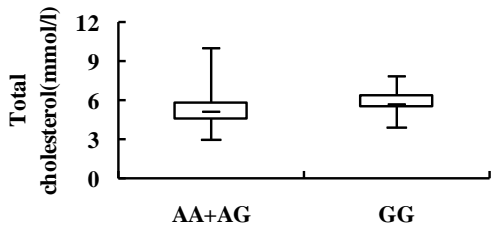

**p=0.018**

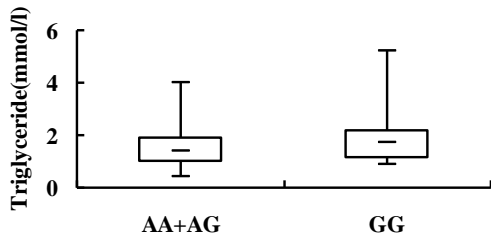

**p=0.36**

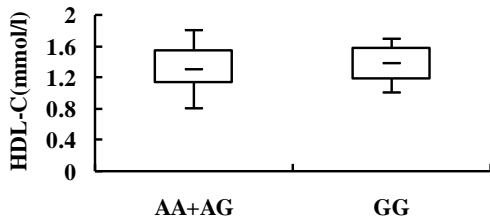

**p=0.038**

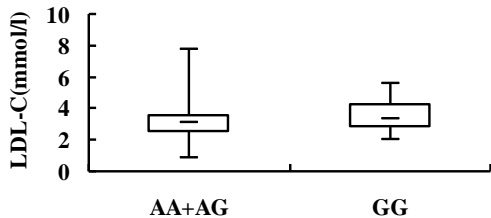

Supplement: MOESM1 [file 9538188]
